# Supplementary material
Source: Springer Nature journal article supplement (https://www.springermedizin.de/resource/supplementary/12913_2011_2044_MOESM1_ESM.pdf/9529846)
Supplement: MOESM1 [file 9529846]

Average no. of hospitalizations

2.1 (1.1, 3.1)

Average no. of doctor visits

26 (20, 31)

Average no. of days unable to carry out normal duties

137 (118, 155)

Average no of days another family member took time off work to care for sick person

54 (42, 65)

Average no. of weeks with GI symptoms

121 (104, 139)

**GI symptoms**

Average no. of hospitalizations

2.0 (1, 3)

Average no. of doctor visits

48 (40, 56)

Average no. of days unable to carry out normal duties

198 (173, 223)

Average no. of days another family member took time off work to care for sick person

63 (48, 77)

Average no. of weeks with respiratory symptoms

492 (439, 545)

**Respiratory symptoms**

Average no. of hospitalizations

0.2 (0.1, 0.5)

Average no. of doctor visits

19 (13, 25)

Average no. of days unable to carry out normal duties

21 (12, 29)

Average no. of days another family member took time off work to care for sick person

8 (3, 12)

Average no. of weeks with dermal symptoms

122 (92, 153)

**Dermal symptoms**
